# Supplementary material for: Hispolon Methyl Ether, a Hispolon Analog, Suppresses the SRC/STAT3/Survivin Signaling Axis to Induce Cytotoxicity in Human Urinary Bladder Transitional Carcinoma Cell Lines
Source: MDPI journal article supplement (doi:10.3390/ijms24010138), 2022-12-21
Supplement: s1 [file s1]

## Supplementary materials for ijms-2088333

### Hispolon Methyl Ether, A Hispolon Analog, Suppresses the SRC/STAT3/Survivin Signaling Axis to Induce Cytotoxicity in Human Urinary Bladder Transitional Carcinoma Cell Lines

Min-Yung Kuo <sup>1,2</sup>, Wei-Ting Yang <sup>3</sup>, Yann-Jen Ho <sup>3</sup>, Ge-Man Chang <sup>2</sup>, Hsiung-Hao Chang <sup>3</sup>, Chao-Yu Hsu <sup>4,5</sup>, Chia-Che Chang <sup>2,3,5,6,7,8,\*</sup> and Yi-Hsin Chen <sup>9,10,\*</sup>

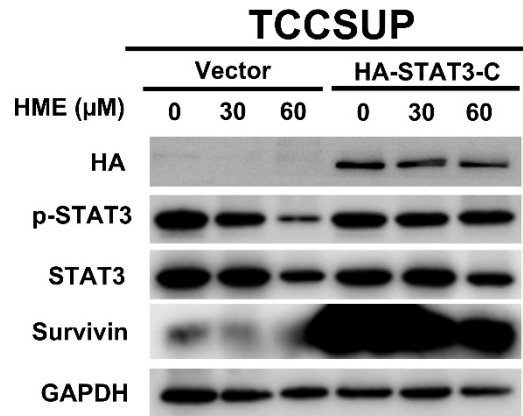

**Figure S1.** Ectopic expression of HA-STAT3-C sustains STAT3 activity following HME treatment. TCCSUP cell clones stably expressing HA-STAT3-C or the corresponding vector control were subjected to 24 h-treatment with HME (0, 30, 60 μM), followed by immunoblotting for the levels of HA, tyrosine 705-phosphorylated STAT3 (p-STAT3), total STAT3, Survivin, and GAPDH (loading control). The constant levels of p-STAT3 and Survivin in HME-treated STAT3-C stable clones illustrate the resistance of cells to HME-mediated STAT3 inhibition endowed by ectopic STAT3-C expression.
